# Supplementary material for: Expanding the interlamellar spacing of biomass-derived hybrids with intercalated nanotubes for enhanced oxygen reduction reaction
Source: Royal Society of Chemistry journal article supplement (doi:10.1039/d1nj05907f), 2022-01-01
Supplement: d1nj05907f13.pdf [file d1nj05907f13.pdf]

# Electronic supplementary Material (ESI) for New Journal of Chemistry

## Expanding interlamellar spacing of biomass-derived hydrids with intercalated nanotubes for enhanced oxygen reduction reaction

*Junting Sun\*, Jiaxiang Jin, Yukan Yang, Jing Wang and Junjie Guo\**

Key Laboratory of Novel Materials for Sensor of Zhejiang Province, Institute of  
Advanced Magnetic Materials, College of Materials & Environmental Engineering,  
Hangzhou Dianzi University, Xiasha higher education Zone, Hangzhou 310018,  
Zhejiang Province, People's Republic of China..

### **Corresponding Author**

E-mail: sunjt@hdu.edu.cn (J. Sun); jguo@hdu.edu.cn (J. Guo)

The number of pages: 19

The number of figures: 11

The number of tables: 4

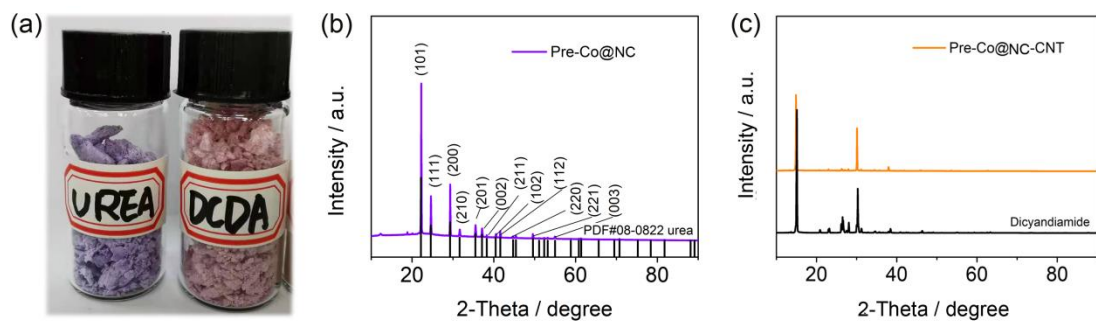

**Fig. S1** (a) photograph of Pre-Co@NC (purple) and Pre-Co@NC-CNT (pink); (b) XRD pattern of Pre-Co@NC; (c) XRD pattern of Pre-Co@NC-CNT.

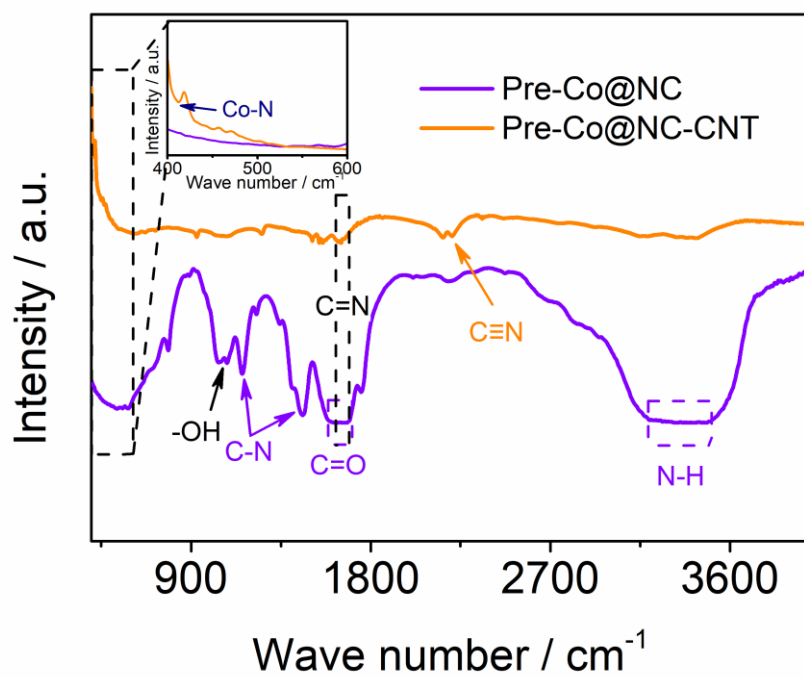

**Fig. S2.** FT-IR spectra of Pre-Co@NC and Pre-Co@NC-CNT.

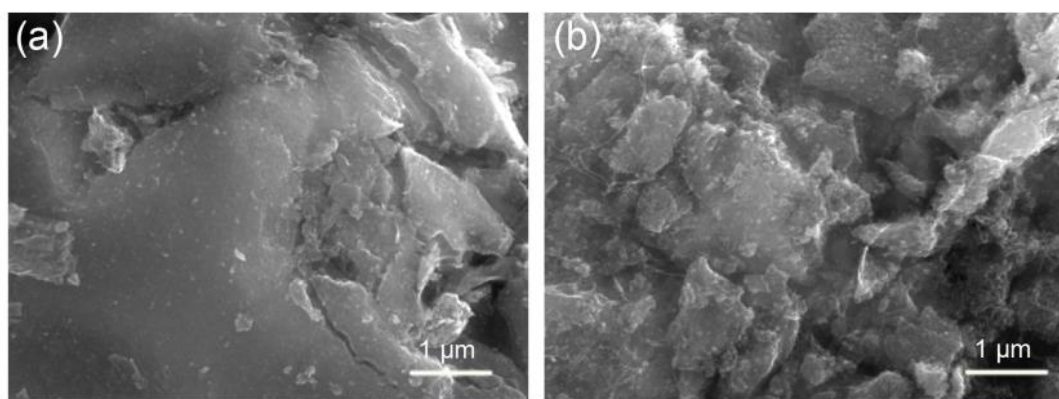

**Fig. S3.** Magnified SEM images of (a) Co@NC and (b) Co@NC-CNT.<sup>1</sup>

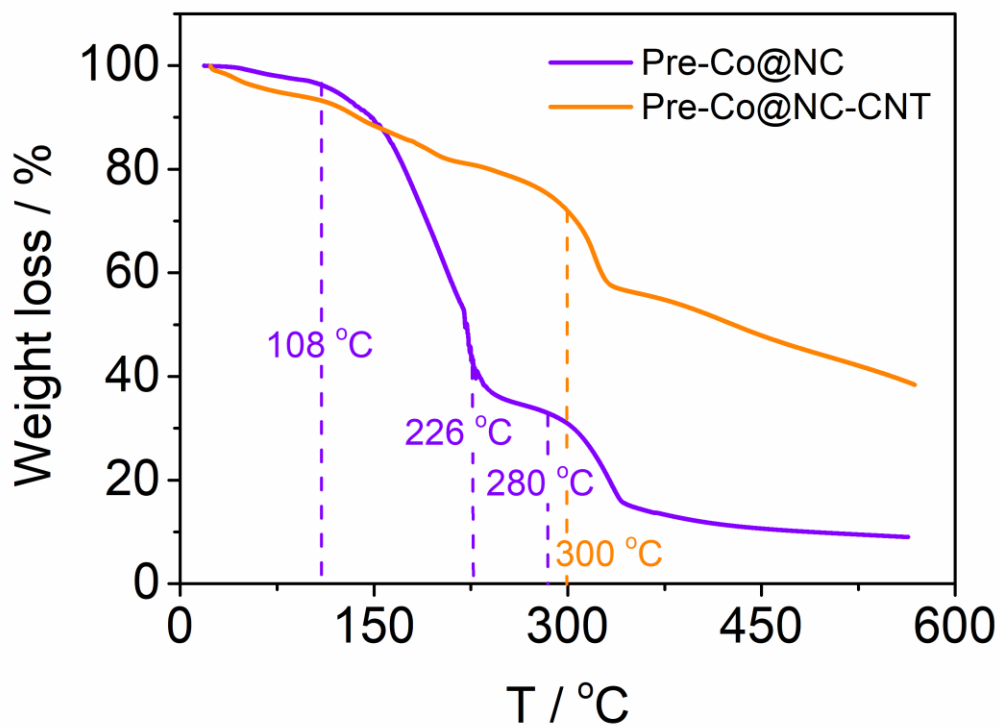

**Fig. S4.** TG curves of Pre-Co@NC and Pre-Co@NC-CNT measured from room temperature to 550 °C with a ramping rate of 10 °C min<sup>-1</sup> under nitrogen atmosphere.

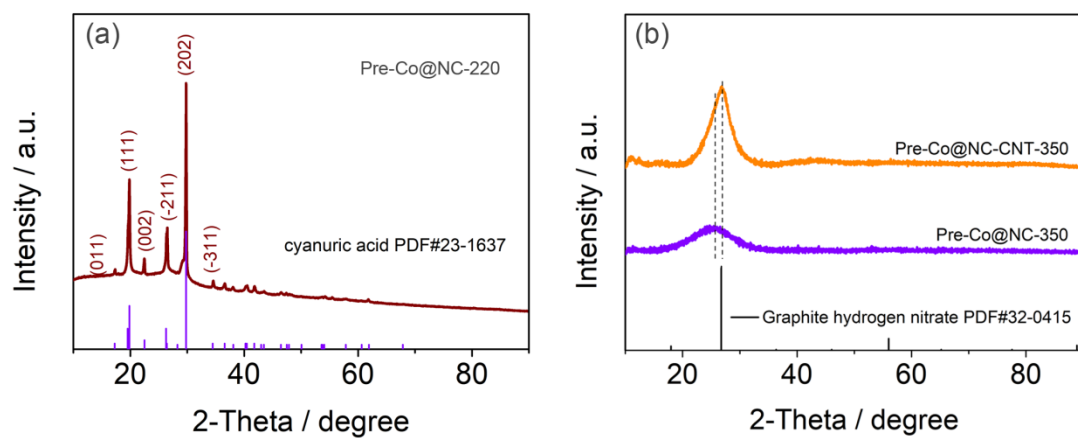

**Fig. S5.** XRD patterns of (a) pyrolyzed Pre-Co@NC at 220 °C; (b) Pre-Co@NC and Pre-Co@NC-CNT pyrolyzed at 350 °C.

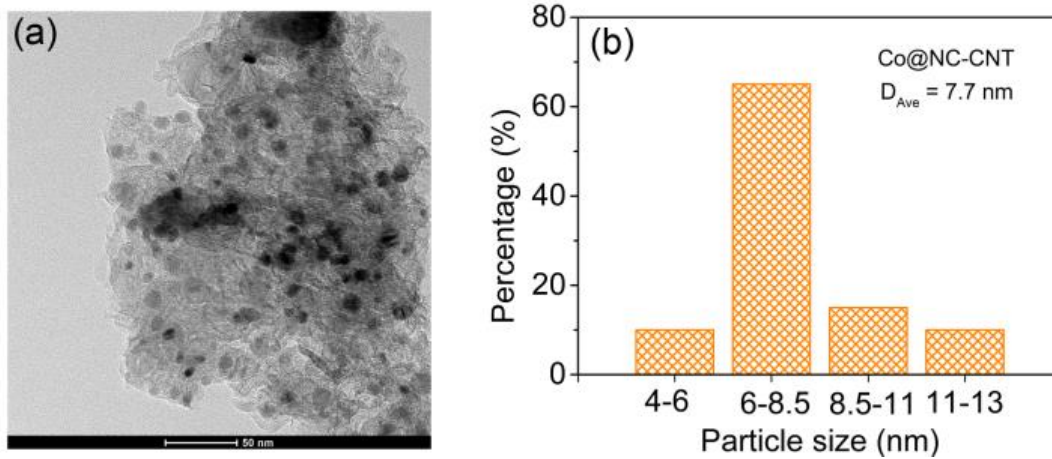

**Fig. S6.** (a) TEM images of Co@NC-CNT; (b) pore size distribution of Co@NC-CNT calculated according to the left TEM images.

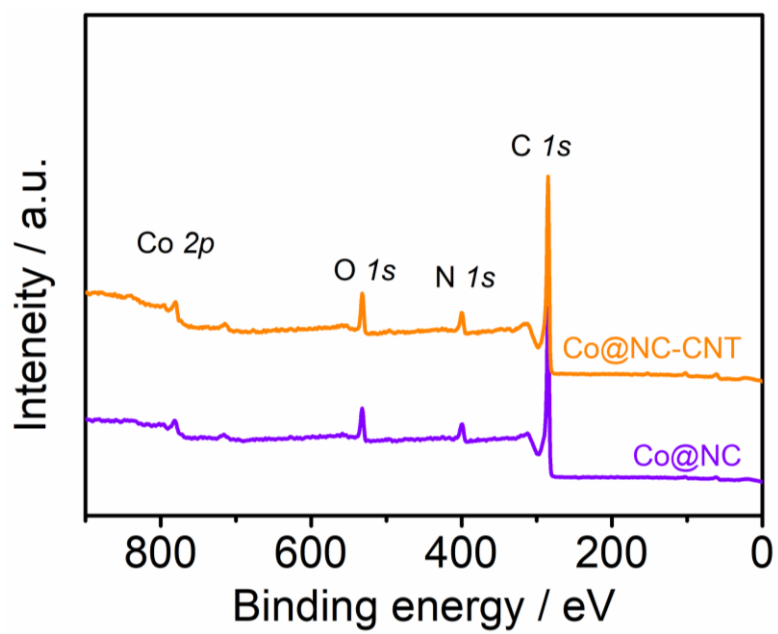

**Fig. S7.** XPS survey spectra of Co@NC and Co@NC-CNT.



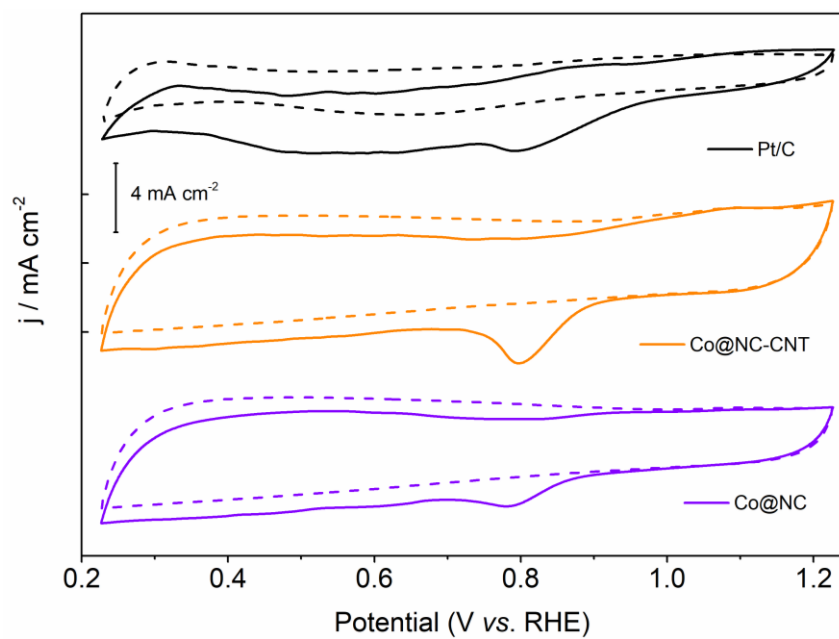

**Fig. S8.** CV curves of Co@NC, Co@NC-CNT and Pt/C measured in  $\text{N}_2$ - and  $\text{O}_2$ -saturated electrolyte at a scanning rate of  $50 \text{ mV s}^{-1}$ .

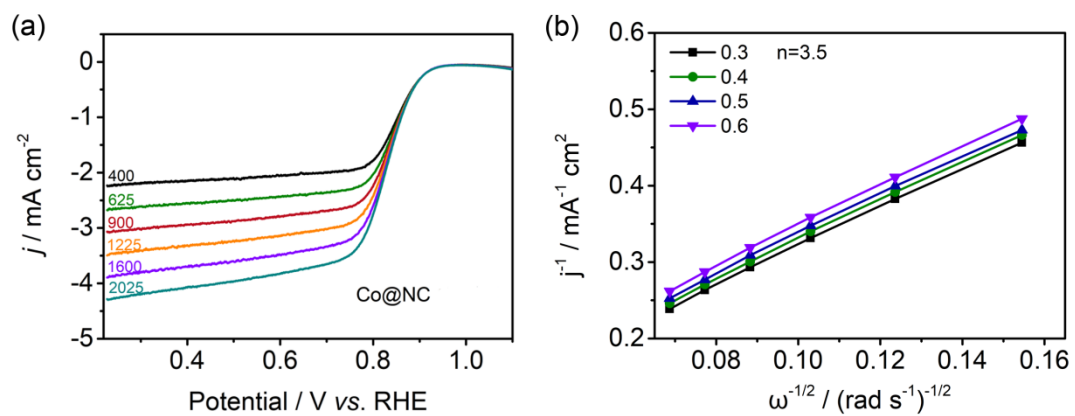

**Fig. S9** (a) LSV curves of Co@NC at different rotating speed in  $O_2$ -saturated electrolyte with a scanning rate of  $5 \text{ mV s}^{-1}$ ; (b) Koutecky-Levich (K-L) plots of Co@NC.

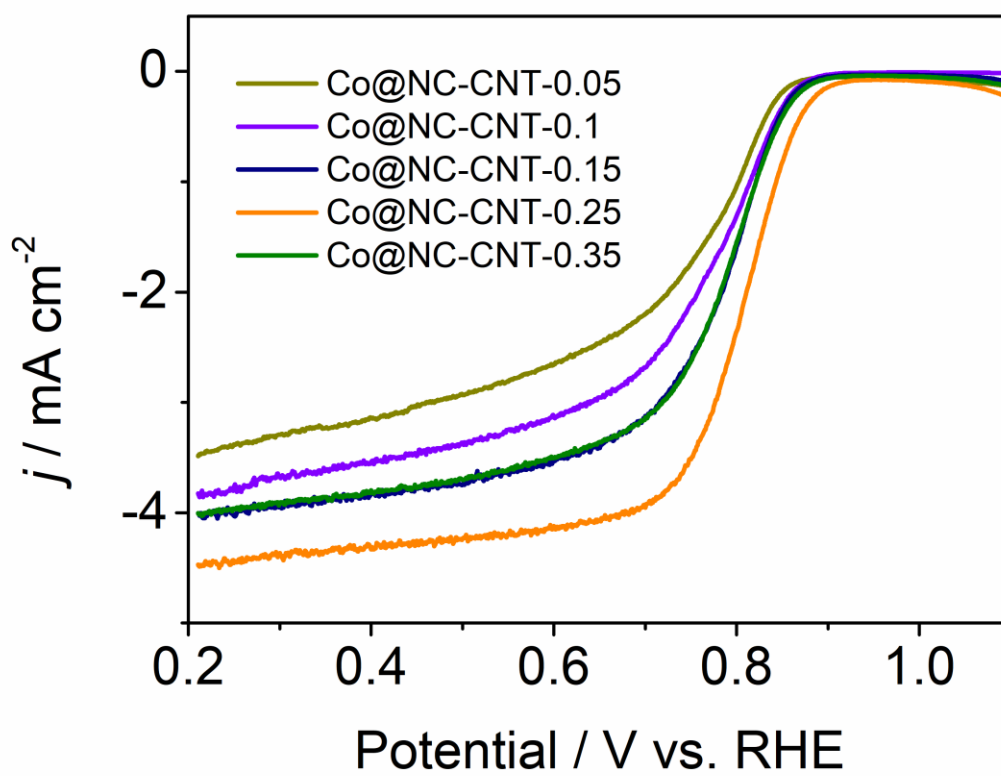

**Fig. S10** LSV curves of Co@NC-CNT obtained using various Co content in precursor.

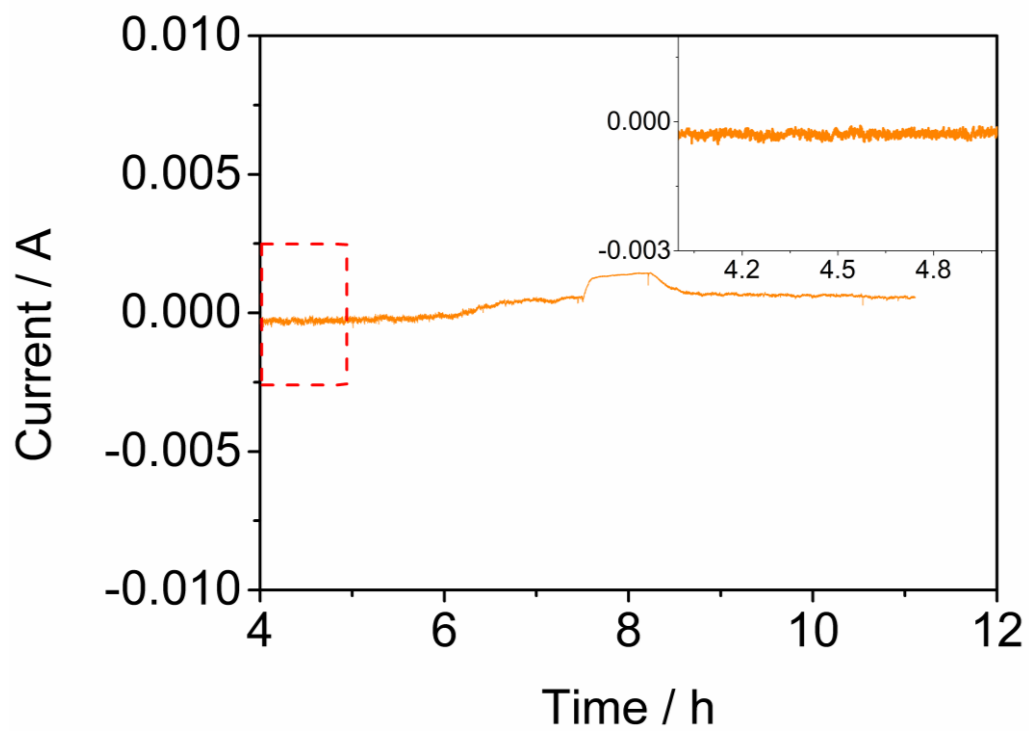

**Fig. S11** Chronoamperometry curves of Co@NC-CNT exhibited from 15000 s to 40000 s.

**Table S1** Relative percentage of micropores, mesopores and macropores.

|           | <b>Pore volume</b><br><b>(cm<sup>3</sup> g<sup>-1</sup>)</b> | <b>Micropores</b><br><b>(%)</b> | <b>Mesopores</b><br><b>(%)</b> |
|-----------|--------------------------------------------------------------|---------------------------------|--------------------------------|
| Co@NC     | 0.17                                                         | 45.9                            | 40.6                           |
| Co@NC-CNT | 0.29                                                         | 21.1                            | 76.2                           |

**Table S2** Summary of C, N, O, Co atomic contents of Co@NC and Co@NC-CNT from XPS analysis.

|           | <b>C at.%</b> | <b>N at.%</b> | <b>O at. %</b> | <b>Co at. %</b> |
|-----------|---------------|---------------|----------------|-----------------|
| Co@NC     | 84.4          | 7.2           | 7.2            | 1.2             |
| Co@NC-CNT | 84.5          | 6.9           | 7.2            | 1.4             |

**Table S3** Atomic percentage of different types of nitrogen of Co@NC-CNT-x ( x refers to U, D, and M) from divided N 1s XPS spectra.

|           | <b>N-6 %<br/>(398.7eV)</b> | <b>Co-N %<br/>(399.5eV)</b> | <b>N-5 %<br/>(400.1eV)</b> | <b>N-G %<br/>(400.9eV)</b> | <b>N-O %<br/>(402.7eV)</b> |
|-----------|----------------------------|-----------------------------|----------------------------|----------------------------|----------------------------|
| Co@NC     | 33.8                       | 11.6                        | 14.3                       | 27.4                       | 12.7                       |
| Co@NC-CNT | 35.2                       | 14.0                        | 5.6                        | 29.7                       | 15.5                       |

**Table S4** Comparison of ORR electrocatalytic activity of Co@NC prepared from different nitrogen source. .

|               | <b>N source</b> | <b>E<sub>onset</sub></b><br><b>(V)</b> | <b>E<sub>1/2</sub></b><br><b>(V)</b> | <b>n</b> | <b>Co</b><br><b>loading</b> | <b>Ref.</b>  |
|---------------|-----------------|----------------------------------------|--------------------------------------|----------|-----------------------------|--------------|
| Co-DCDA-C     | dicyandiamide   | 0.94*                                  | 0.847                                | 3.9*     | 1.01<br>at.%                | 2            |
| Co@NCNT       | melamine        | 0.98                                   | 0.86                                 | 3.85     | 3.78<br>at.%                | 3            |
| H-Co@FeCo/N/C | dopamine        | 1.03                                   | 0.91                                 | 3.9*     | 0.94<br>at.%                | 4            |
| Co-N-CDC-CNT  | dicyandiamide   | 0.91                                   | 0.82                                 | 3.6      | 0.11<br>at.%                | 5            |
| CoNC-AT       | dicyandiamide   | 0.924                                  | 0.82                                 | 3.6      | 1.60<br>at.%                | 6            |
| Co/NC         | Polypyrrole     | 0.94                                   | 0.86                                 | 3.95     | 0.75<br>at.%                | 7            |
| Co-Cat-T500   | melamine        | 0.96                                   | 0.86                                 | 3.7      | --                          | 8            |
| Co/N-CNTs     | ZIF-67          | 0.975                                  | 0.85                                 | 3.9      | 0.63<br>at.%                | 9            |
| Co-NC-900     | melamine        | 0.93*                                  | 0.84                                 | 3.75     | 0.25<br>at.%                | 10           |
| Co@NC         | urea            | 0.94                                   | 0.80                                 | 3.5      | 1.2 at.%                    | This<br>work |
| Co@NC-CNT     | dicyandiamide   | 0.97                                   | 0.85                                 | 3.9      | 1.4 at.%                    | This<br>work |

REFERENCES



1. Li, W.; Wang, D.; Zhang, Y.; Tao, L.; Wang, T.; Zou, Y.; Wang, Y.; Chen, R.; Wang, S., Defect Engineering for Fuel-Cell Electrocatalysts. *Adv. Mater.* **2020**, *32*, (19), e1907879.
2. Wang, D.; Yang, P.; Xu, H.; Ma, J.; Du, L.; Zhang, G.; Li, R.; Jiang, Z.; Li, Y.; Zhang, J.; An, M., The dual-nitrogen-source strategy to modulate a bifunctional hybrid Co/Co-N-C catalyst in the reversible air cathode for Zn-air batteries. *J. Power Sources.* **2021**, *485*, 229339.
3. Li, Y.; Gao, J.; Zhang, F.; Qian, Q.; Liu, Y.; Zhang, G., Hierarchical 3D macrosheets composed of interconnected in situ cobalt catalyzed nitrogen doped carbon nanotubes as superior bifunctional oxygen electrocatalysts for rechargeable Zn-air batteries. *J. Mater. Chem. A.* **2018**, *6*, (32), 15523-15529.
4. Wu, Y.-j.; Wu, X.-h.; Tu, T.-x.; Zhang, P.-f.; Li, J.-t.; Zhou, Y.; Huang, L.; Sun, S.-g., Controlled synthesis of FeN<sub>x</sub>-CoN<sub>x</sub> dual active sites interfaced with metallic Co nanoparticles as bifunctional oxygen electrocatalysts for rechargeable Zn-air batteries. *Appl. Catal. B: Environ.* **2020**, *278*, 119259.
5. Lilloja, J.; Kibena-Põldsepp, E.; Sarapuu, A.; Kodali, M.; Chen, Y.; Asset, T.; Käärik, M.; Merisalu, M.; Paiste, P.; Aruväli, J.; Treshchalov, A.; Rähn, M.; Leis, J.; Sammelselg, V.; Holdcroft, S.; Atanasov, P.; Tammeveski, K., Cathode Catalysts Based on Cobalt- and Nitrogen-Doped Nanocarbon Composites for Anion Exchange Membrane Fuel Cells. *ACS Appl. Energ. Mater.* **2020**, *3*, (6), 5375-5384.

6. Kisand, K.; Sarapuu, A.; Danilian, D.; Kikas, A.; Kisand, V.; Rahn, M.; Treshchalov, A.; Kaarik, M.; Merisalu, M.; Paiste, P.; Aruvali, J.; Leis, J.; Sammelseg, V.; Holdcroft, S.; Tammeveski, K., Transition metal-containing nitrogen-doped nanocarbon catalysts derived from 5-methylresorcinol for anion exchange membrane fuel cell application. *J. Colloid Interf. Sci.* **2021**, 584, 263-274.
7. Zhang, D.; Sun, P.; Zhou, Q.; Li, B.; Wei, Y.; Gong, T.; Huang, N.; Lv, X.; Fang, L.; Sun, X., Enhanced oxygen reduction and evolution in N-doped carbon anchored with Co nanoparticles for rechargeable Zn-air batteries. *Appl. Surf. Sci.* **2021**, 542, 148700.
8. Zhong, H.; Estudillo-Wong, L. A.; Gao, Y.; Feng, Y.; Alonso-Vante, N., Cobalt-Based Multicomponent Oxygen Reduction Reaction Electrocatalysts Generated by Melamine Thermal Pyrolysis with High Performance in an Alkaline Hydrogen/Oxygen Microfuel Cell. *ACS appl. Mater. Interf.* **2020**, 12, (19), 21605-21615.
9. Liu, B.; Zhou, H.; Jin, H.; Zhu, J.; Wang, Z.; Hu, C.; Liang, L.; Mu, S.; He, D., A new strategy to access Co/N co-doped carbon nanotubes as oxygen reduction reaction catalysts. *Chinese Chem. Lett.* **2021**, 32, (1), 535-538.
10. Zhang, S.; Shang, N.; Gao, S.; Meng, T.; Wang, Z.; Gao, Y.; Wang, C., Ultra dispersed Co supported on nitrogen-doped carbon: An efficient electrocatalyst for oxygen reduction reaction and Zn-air battery. *Chem. Eng. Sci.* **2021**, 234,

116442.
