# Supplementary figures and images for: Expanding the interlamellar spacing of biomass-derived hybrids with intercalated nanotubes for enhanced oxygen reduction reaction
Source: Royal Society of Chemistry journal article supplement (doi:10.1039/d1nj05907f), 2022-01-01

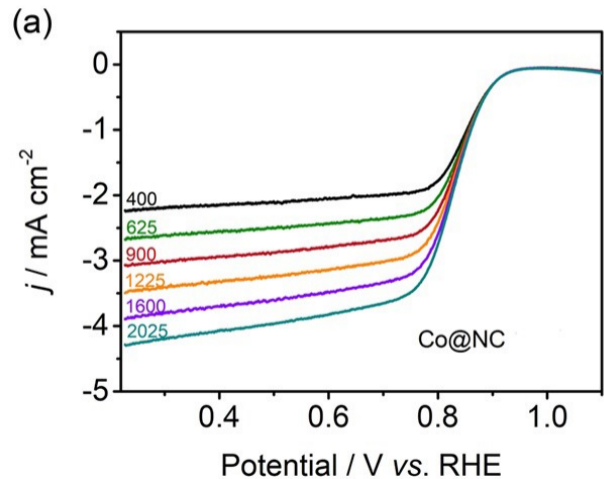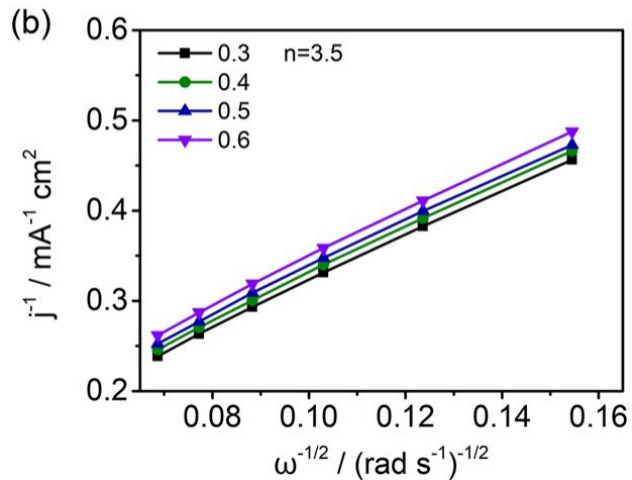

Supplement: d1nj05907f10.pdf [file d1nj05907f10.pdf]

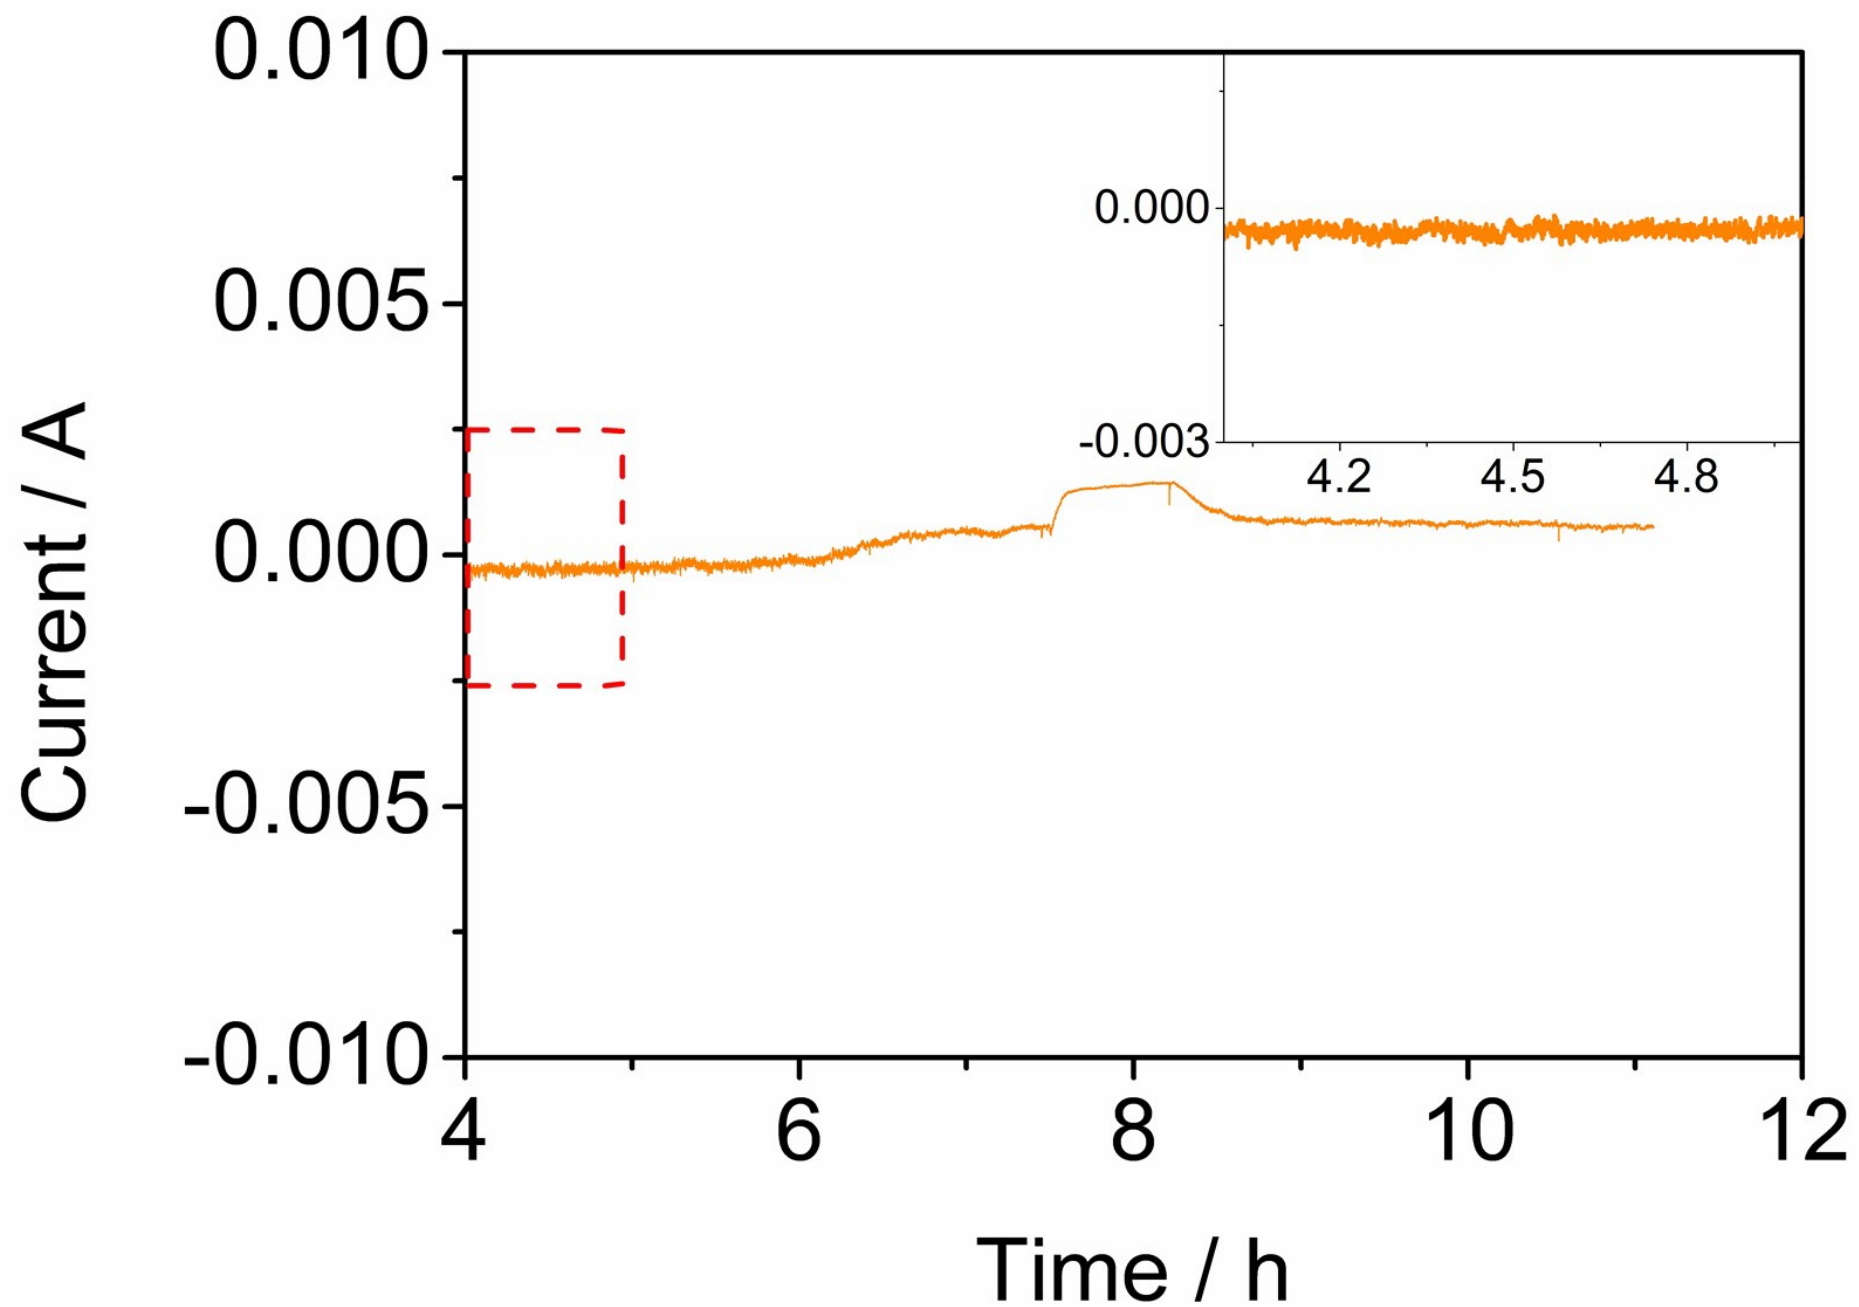

Supplement: d1nj05907f11.pdf [file d1nj05907f11.pdf]

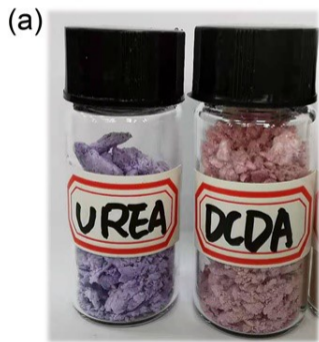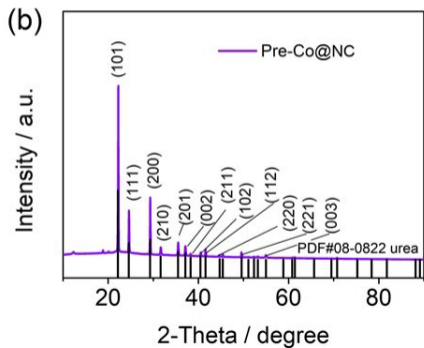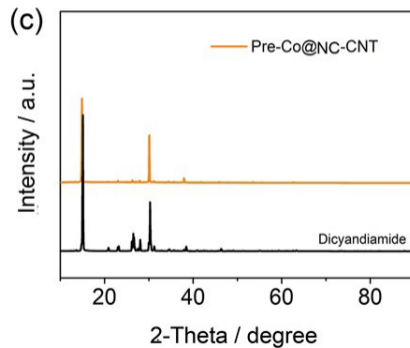

Supplement: d1nj05907f12.pdf [file d1nj05907f12.pdf]

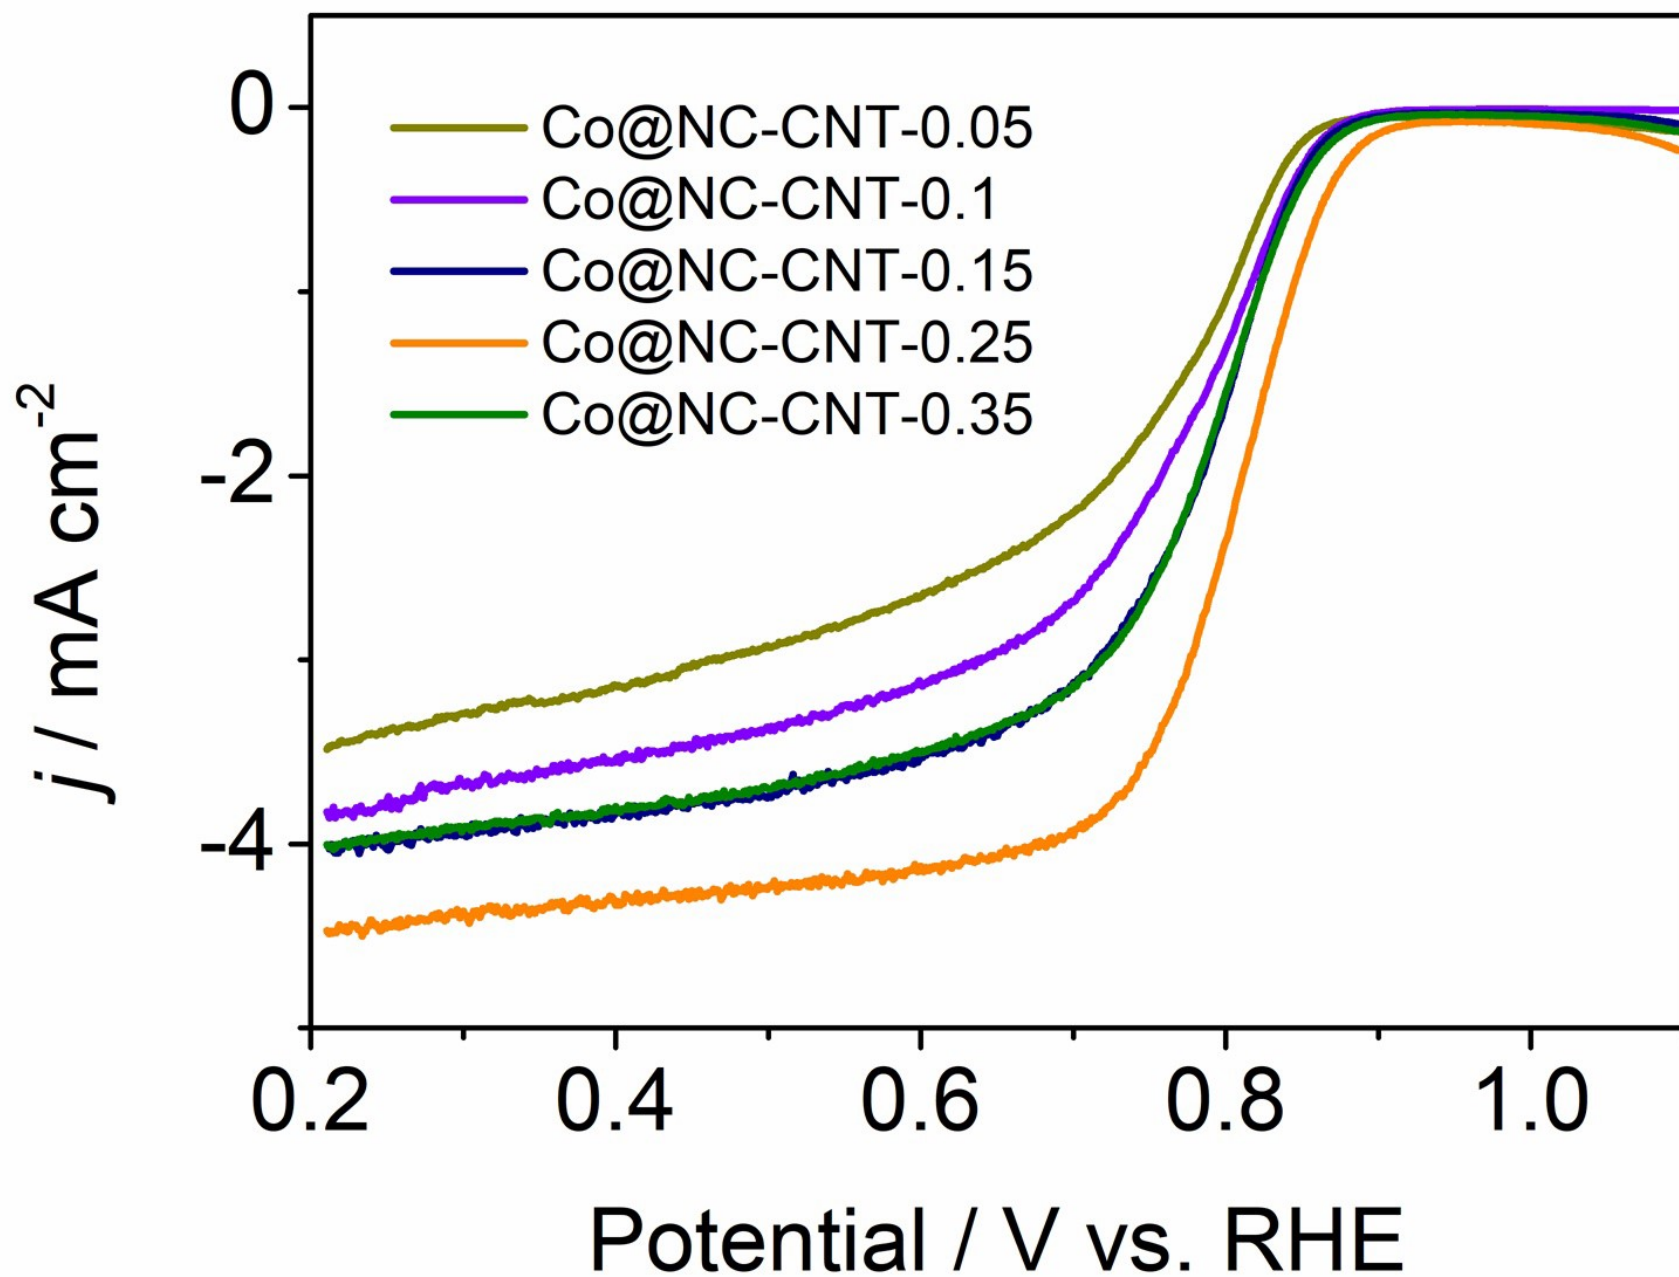

Supplement: d1nj05907f2.pdf [file d1nj05907f2.pdf]

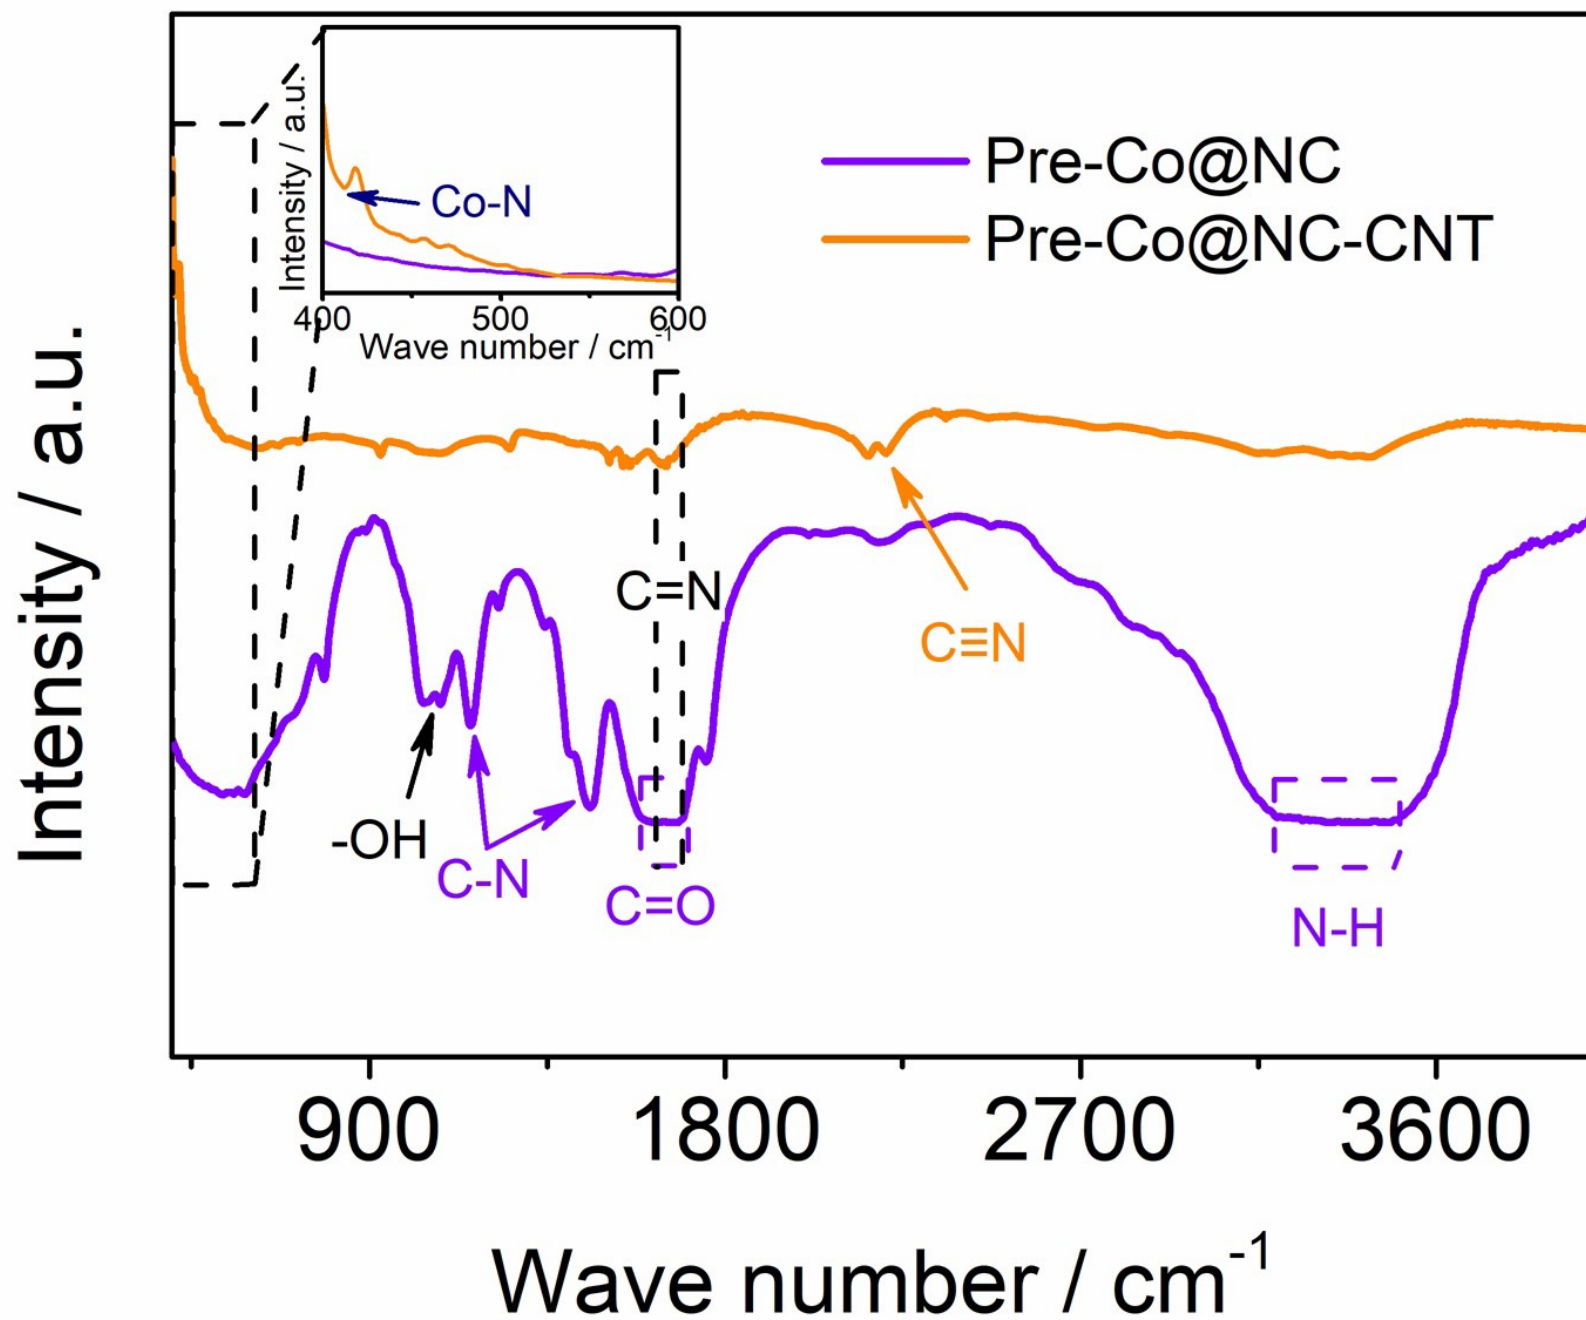

Supplement: d1nj05907f3.pdf [file d1nj05907f3.pdf]

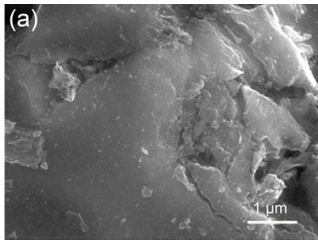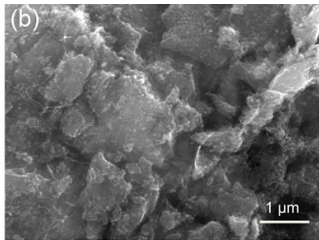

Supplement: d1nj05907f4.pdf [file d1nj05907f4.pdf]

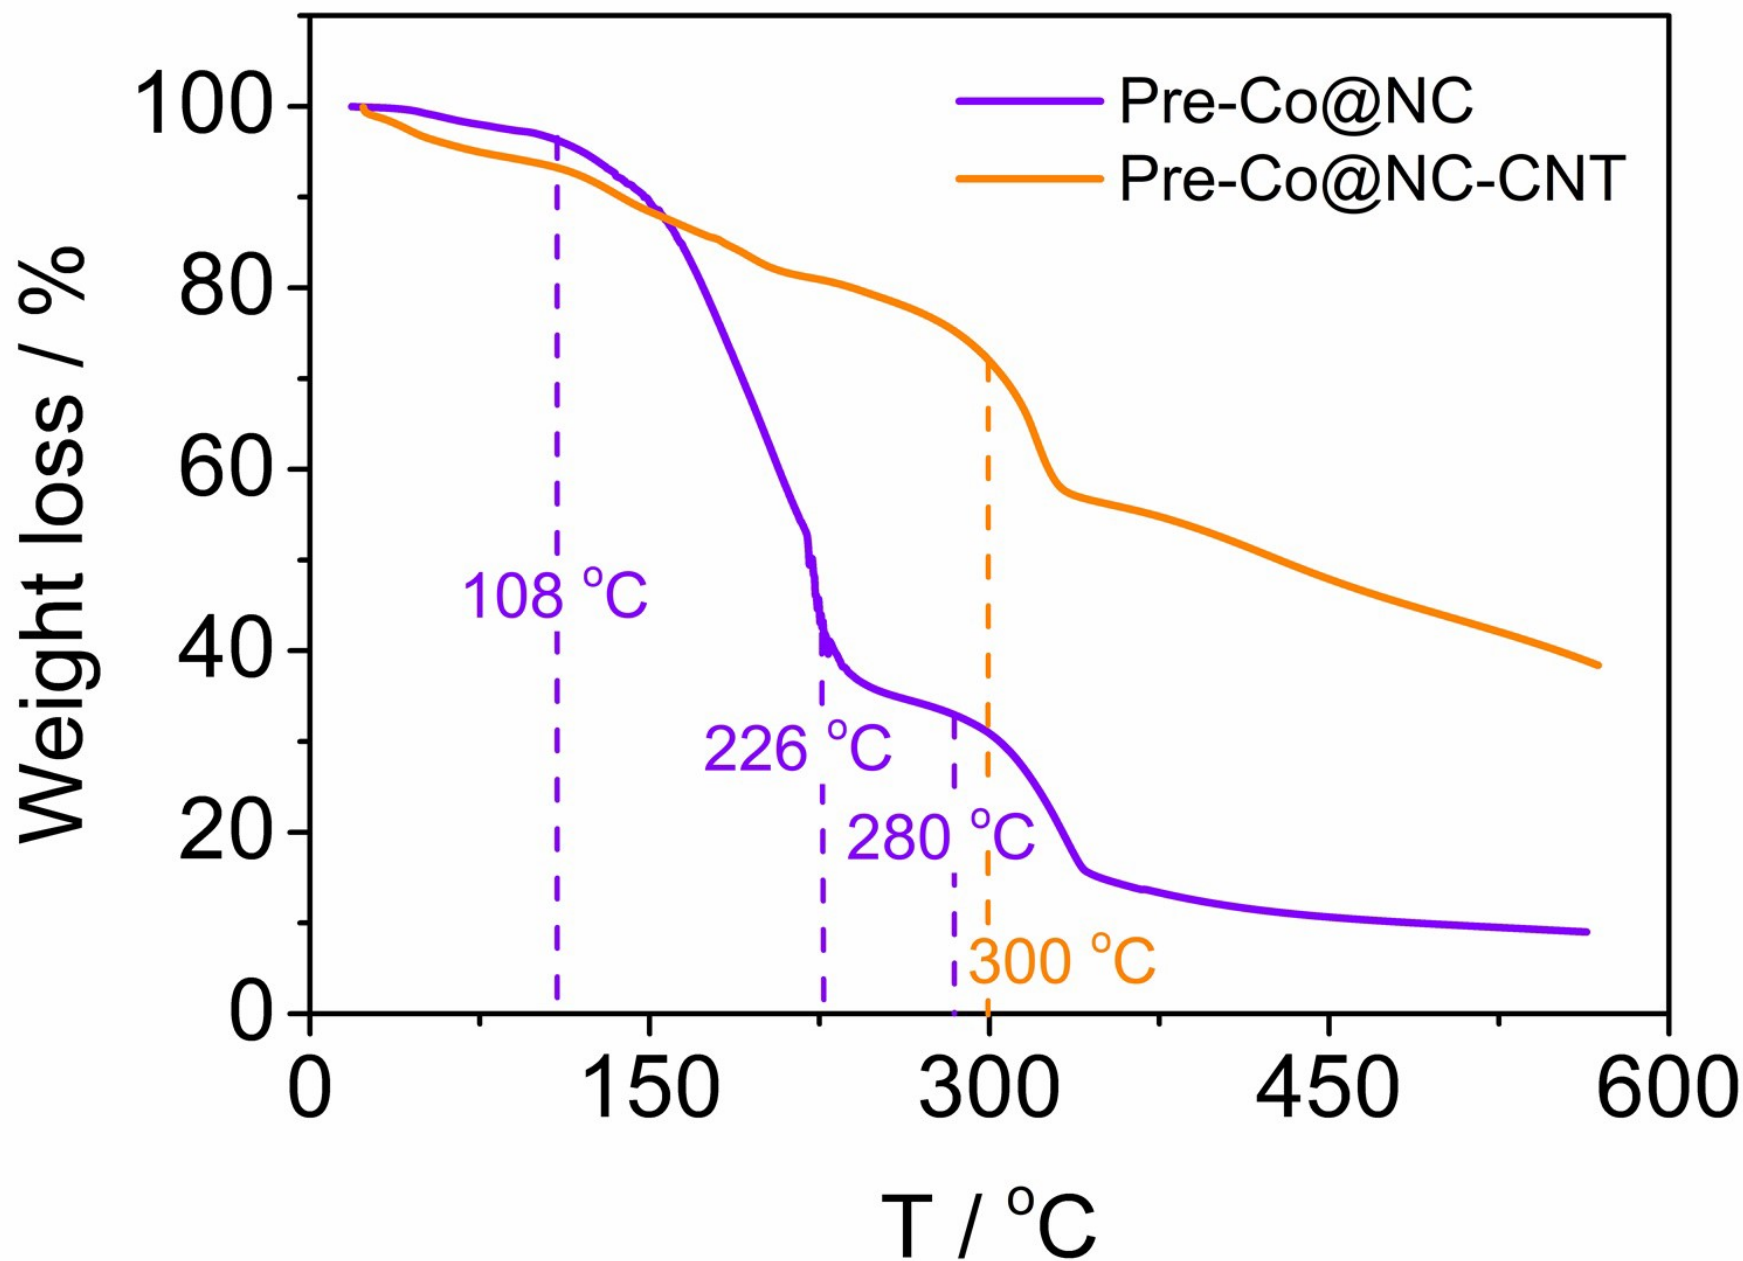

Supplement: d1nj05907f5.pdf [file d1nj05907f5.pdf]

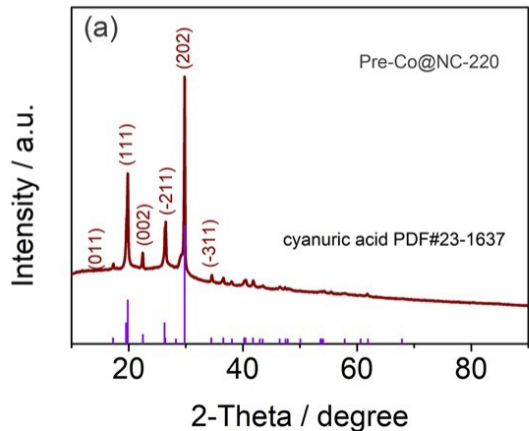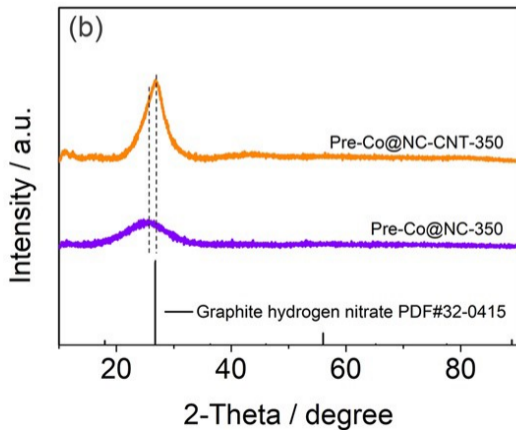

Supplement: d1nj05907f6.pdf [file d1nj05907f6.pdf]

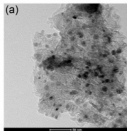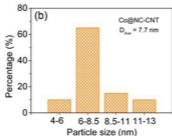

Supplement: d1nj05907f7.pdf [file d1nj05907f7.pdf]

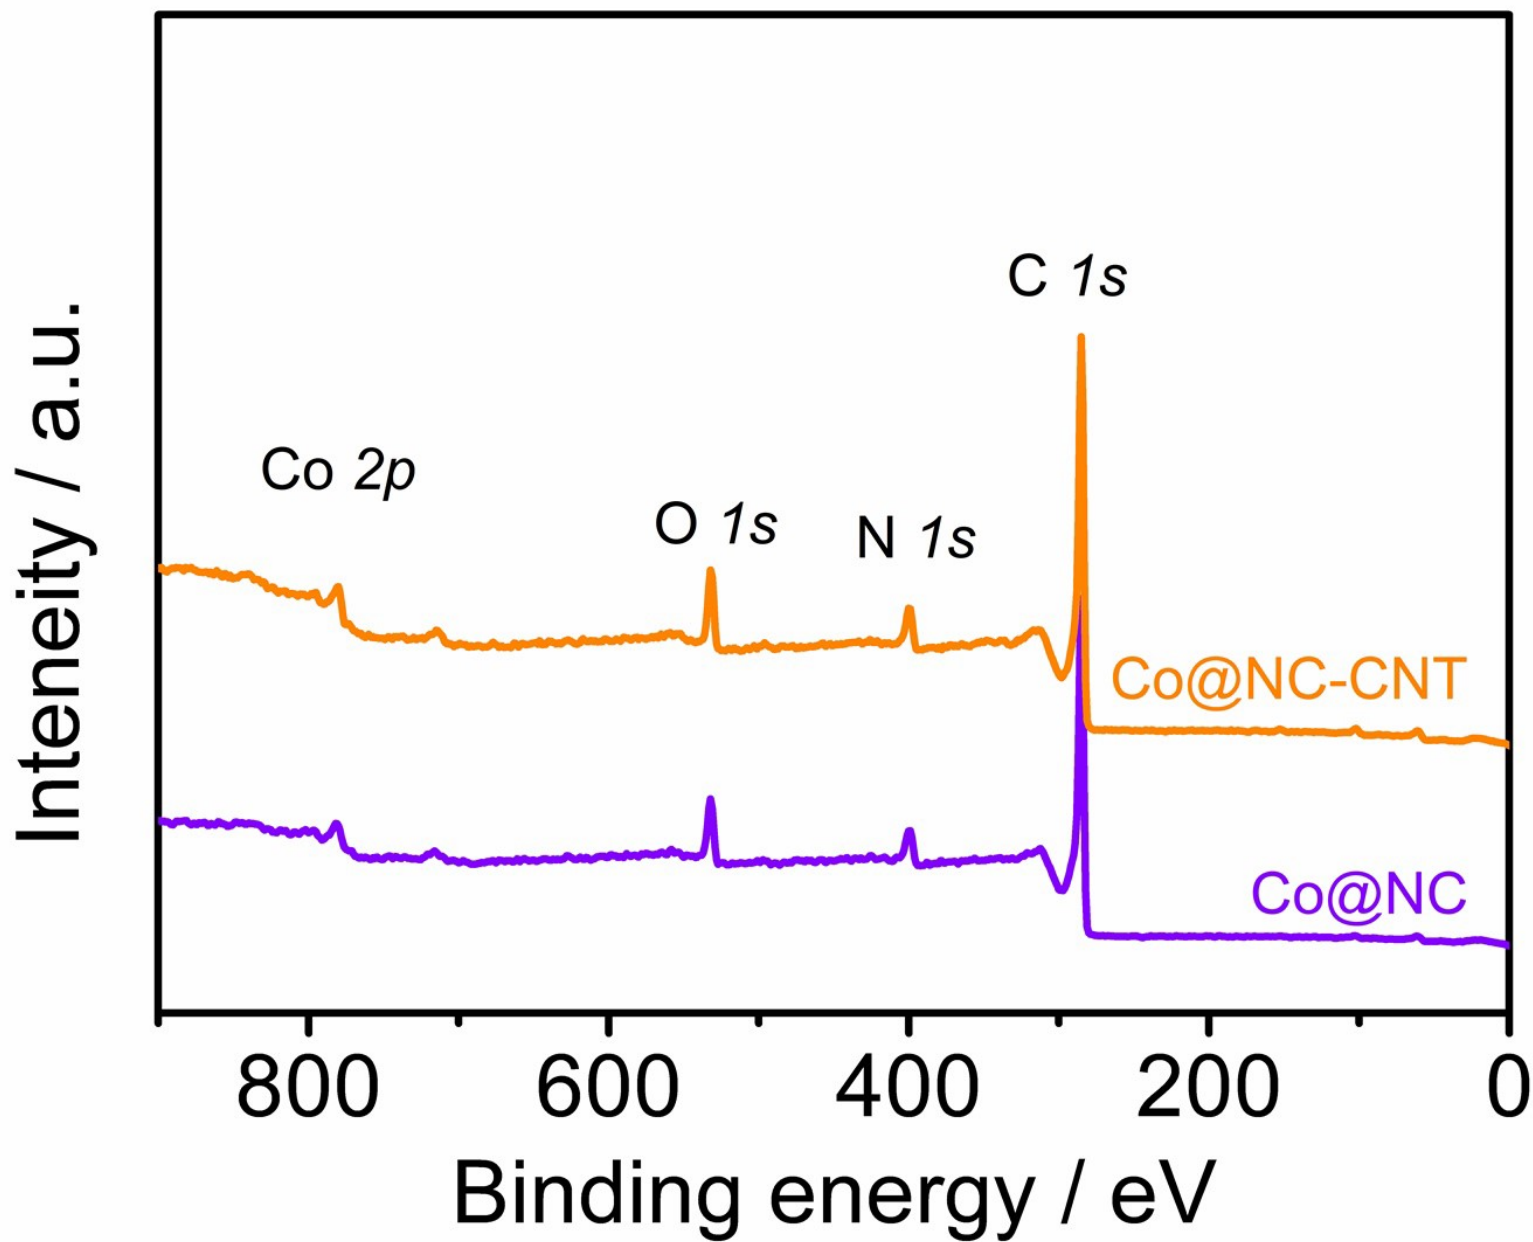

Supplement: d1nj05907f8.pdf [file d1nj05907f8.pdf]

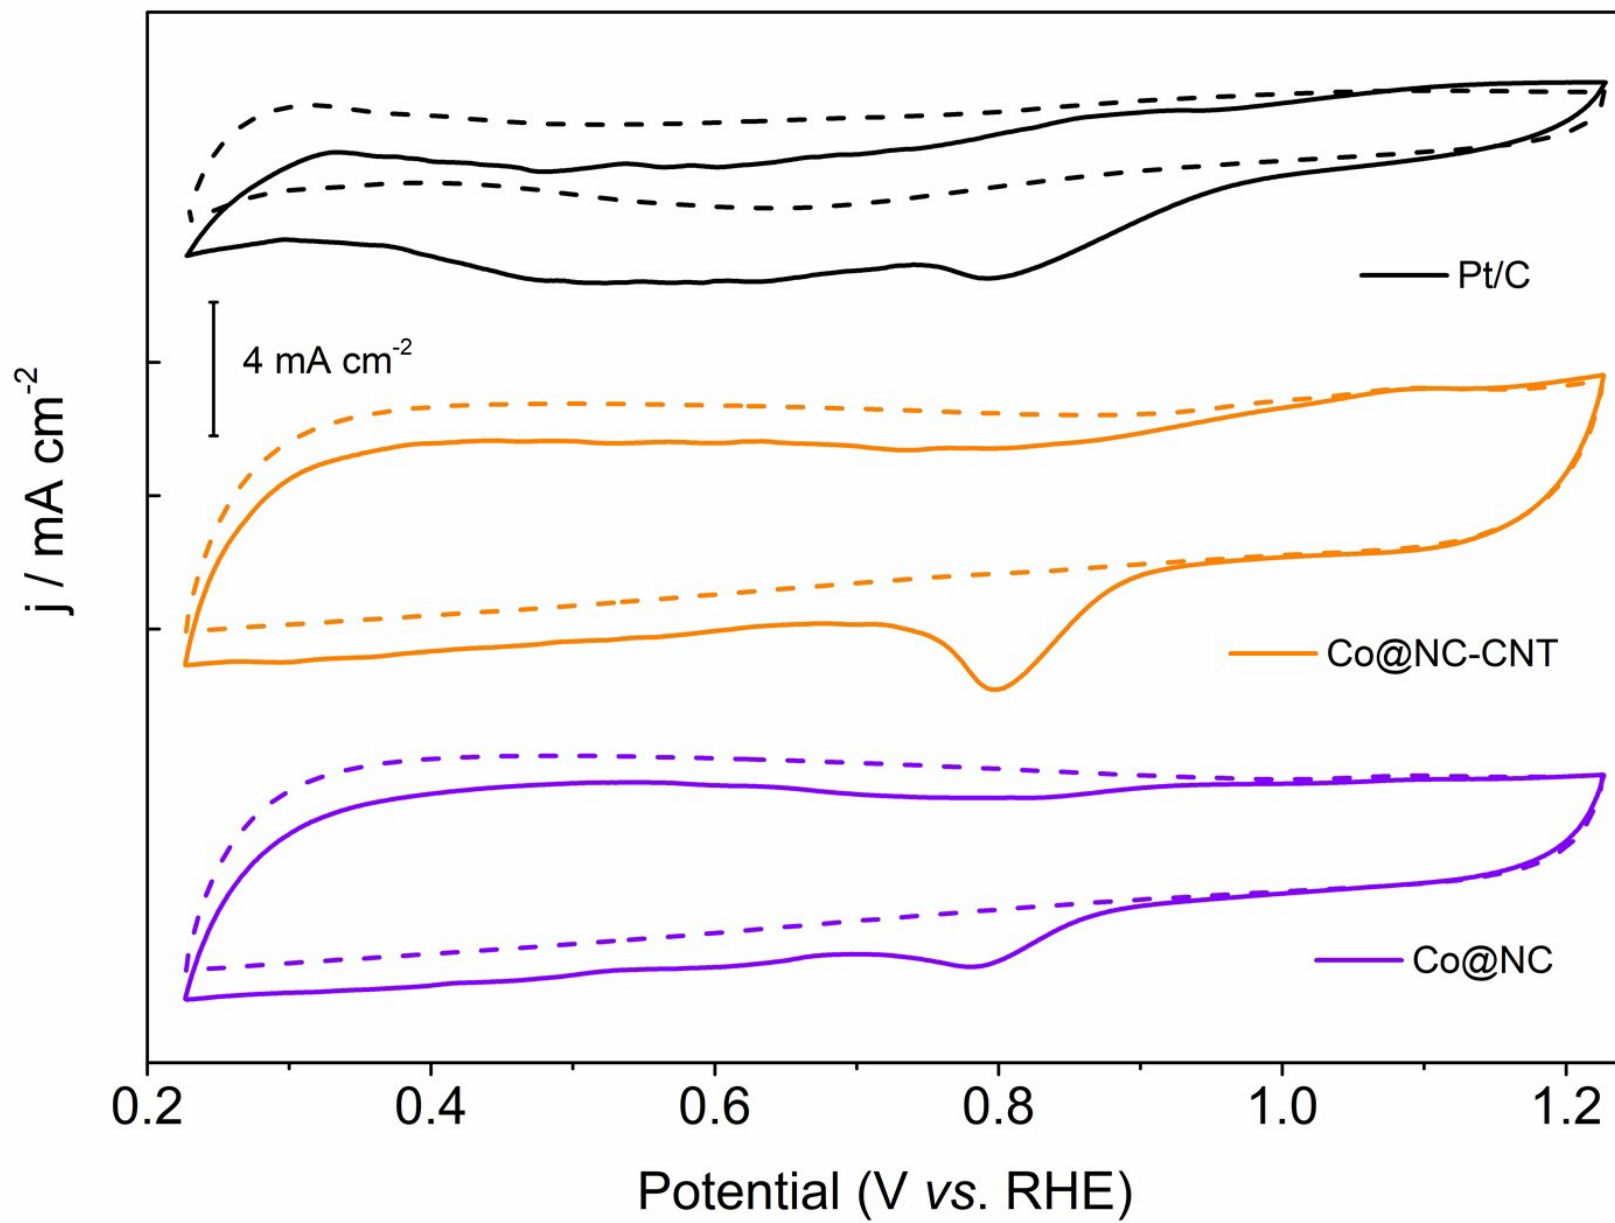

Supplement: d1nj05907f9.pdf [file d1nj05907f9.pdf]
